# Supplementary material
Source: PubMed Central journal article supplement (PMC8562866)

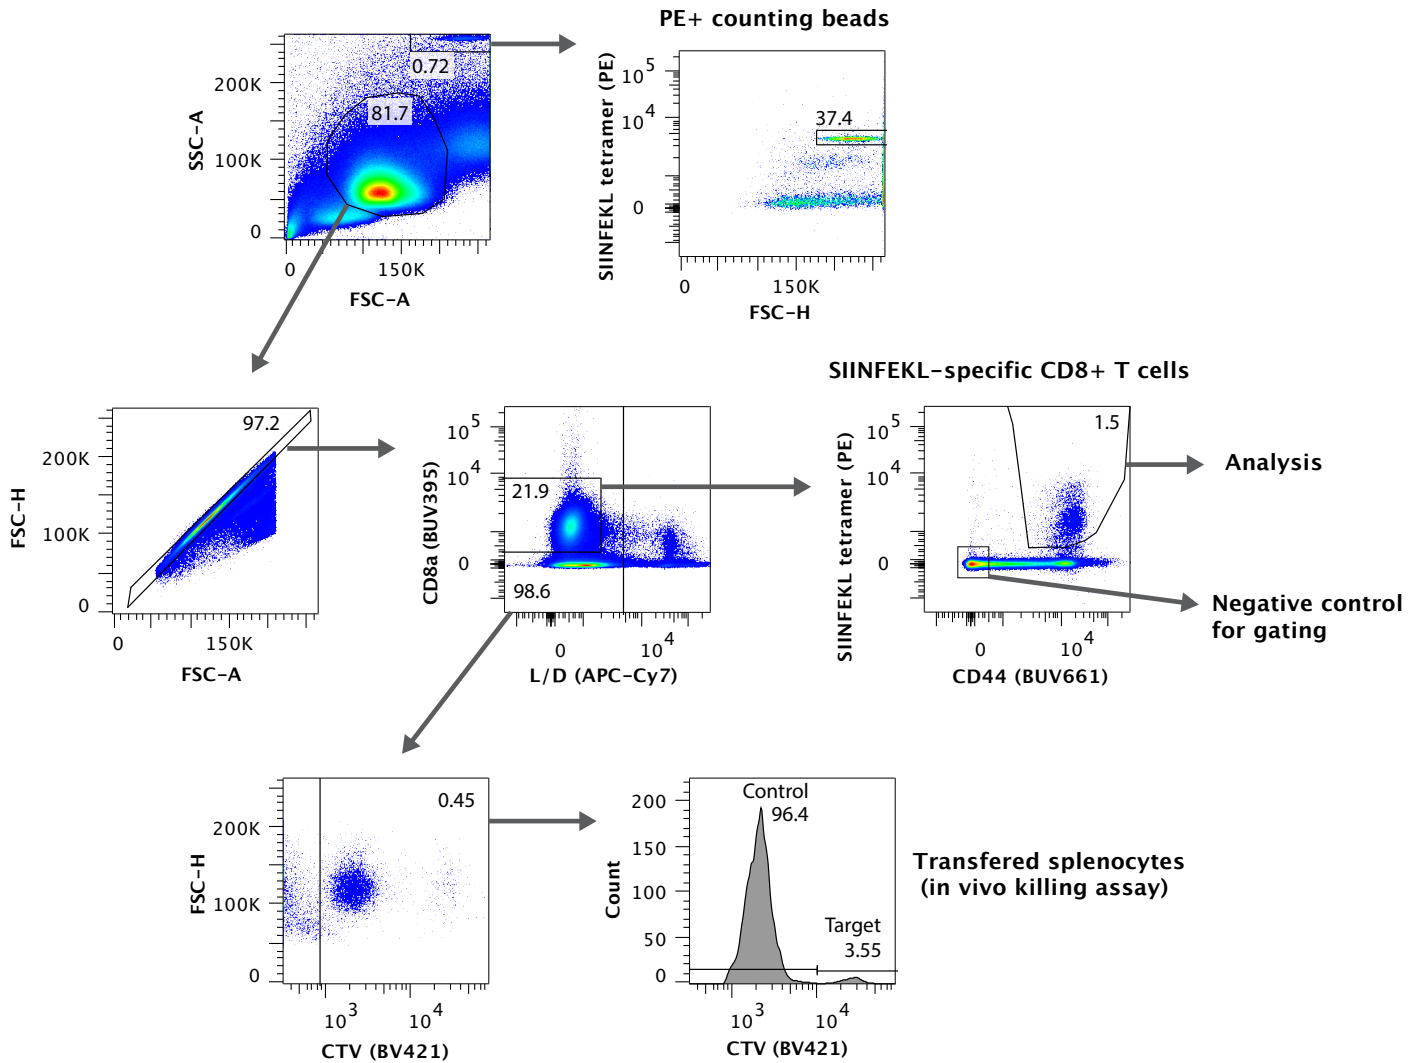

Supplement: NIHMS1725490-supplement-Flow_cytometry_gating_strategy.pdf [file NIHMS1725490-supplement-Flow_cytometry_gating_strategy.pdf]
